# Supplementary material for: Pectin cross-linked enzyme aggregates (pectin-CLEAs) of glucoamylase
Source: Royal Society of Chemistry journal article supplement (doi:10.1039/c4ra09552a), 2014-01-01
Supplement: c4ra09552a1.pdf [file c4ra09552a1.pdf]

## Electronic supplementary information

### **Pectin cross-linked enzyme aggregates (pectin-CLEAs) of glucoamylase**

**Sachin Talekar\*, Shamraja Nadar, Asavari Joshi, Gandhali Joshi**

*Department of Biotechnology Engineering, Kolhapur Institute of Technology's College of  
Engineering, Kolhapur 416 234, India*

*\* Corresponding author. Tel.: +91-0231-2638141; Fax: +91-0231-2638881*

*E-mail address: sachintalekar7@gmail.com (Sachin Talekar).*

*Postal address:*

*Department of Biotechnology Engineering,*

*Kolhapur Institute of Technology's College of Engineering, Gokul Shirgaon,*

*Kolhapur 416 234, Maharashtra, India.*

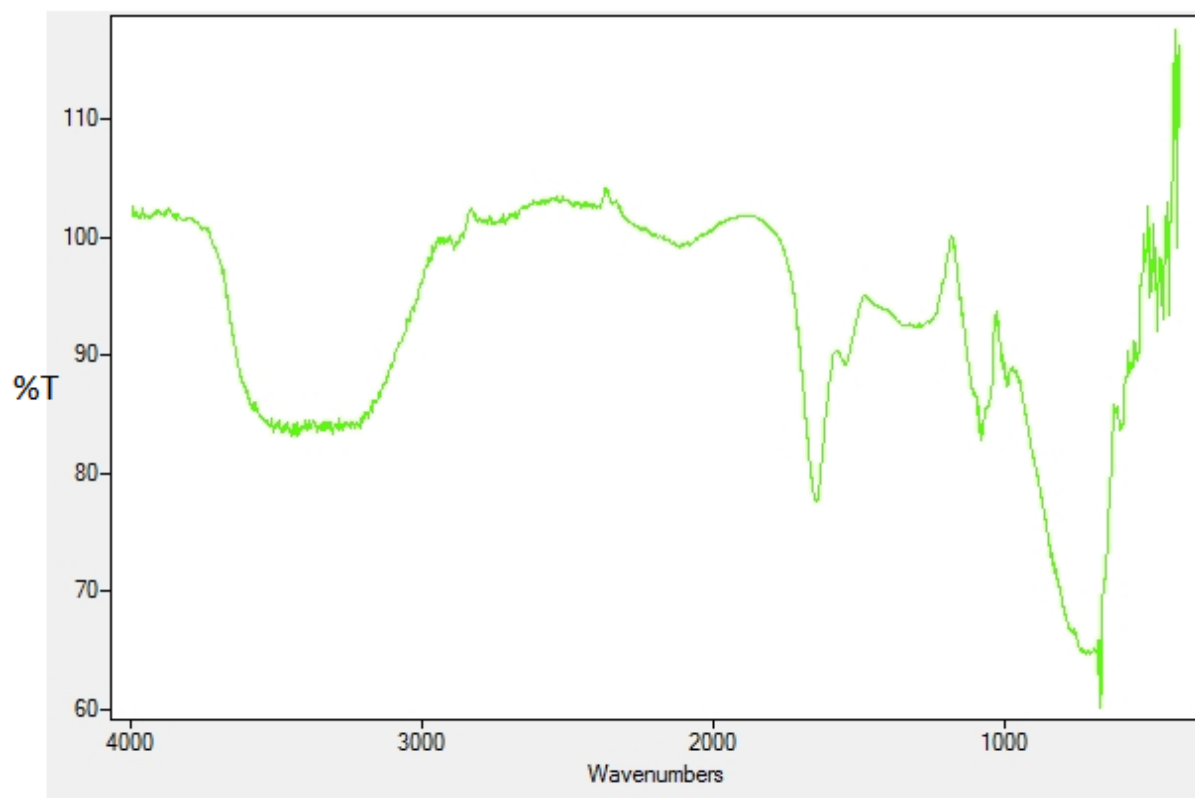

Fig. S1 FTIR spectrum of free enzyme

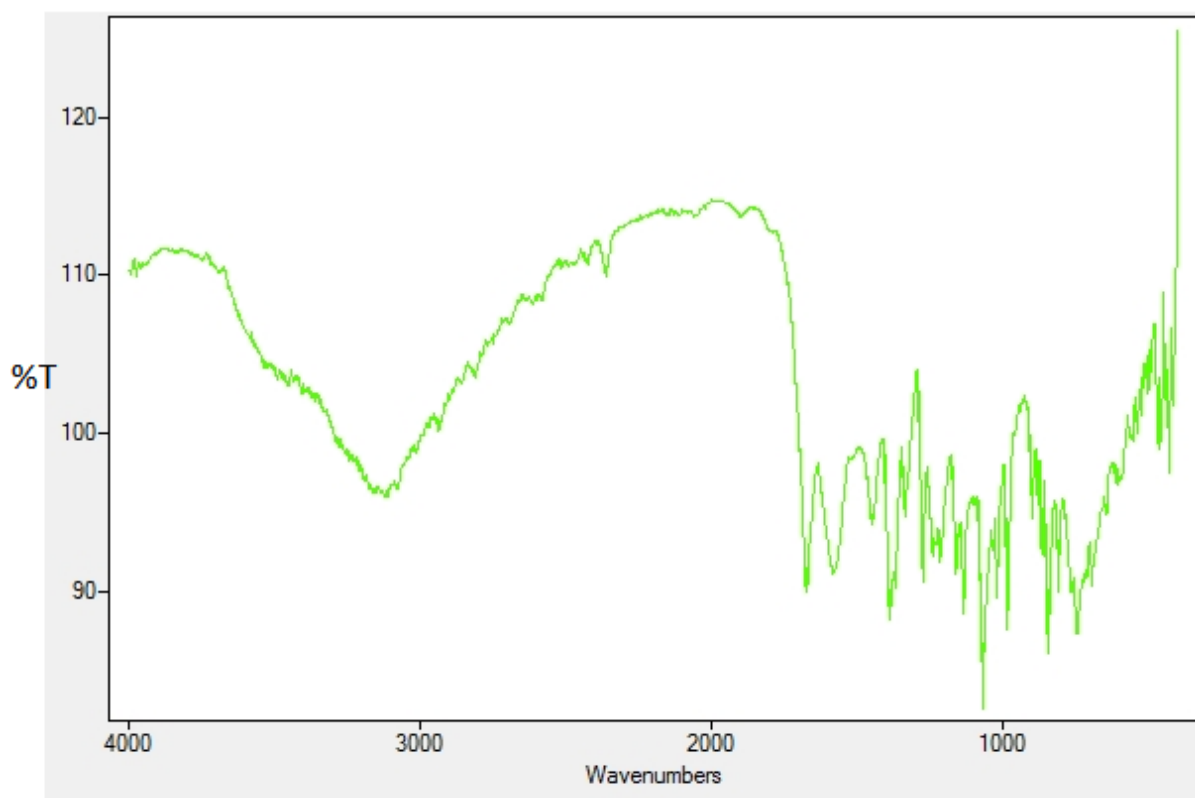

Fig. S2 FTIR spectrum of pectin-CLEAs

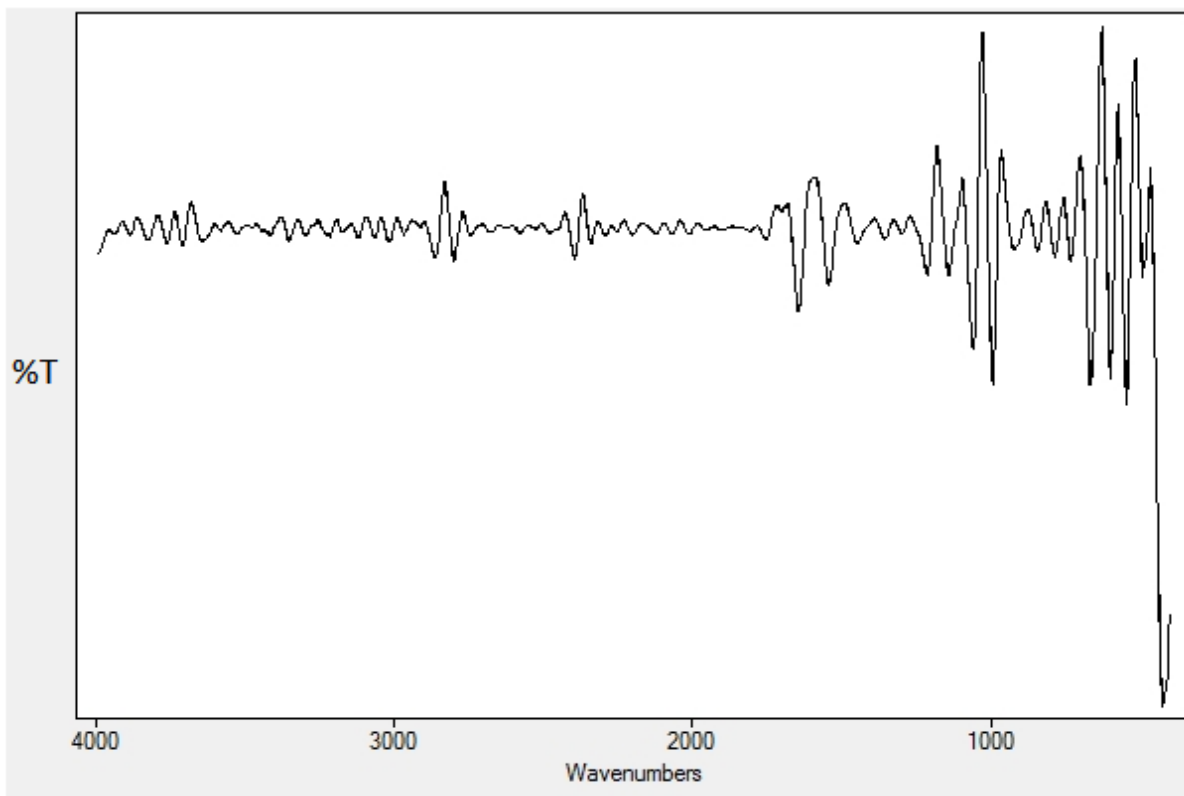

Fig. S3 Second derivative FTIR spectrum (smoothened) of free enzyme

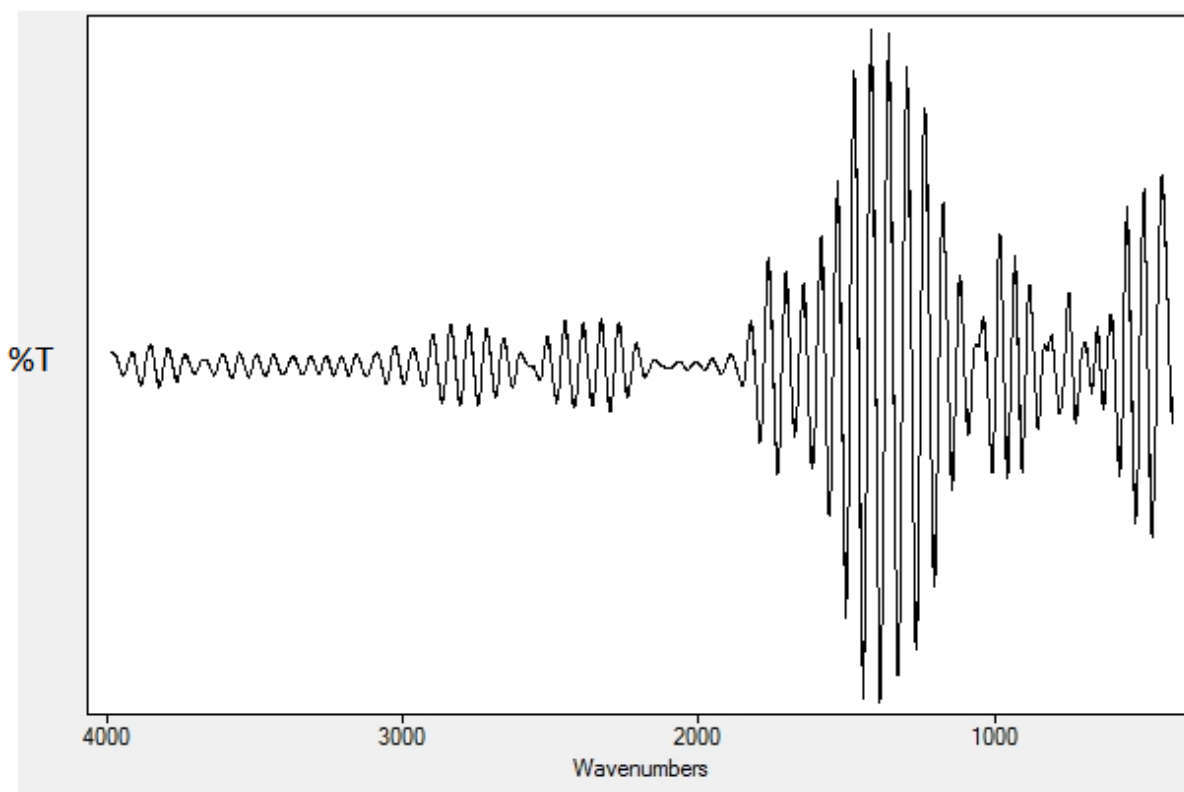

Fig. S4 Second derivative FTIR spectrum (smoothened) of pectin-CLEAs
